# Supplementary material
Source: PubMed Central journal article supplement (PMC3189017)

# Supporting Information

Pallaoro et al. 10.1073/pnas.1109490108

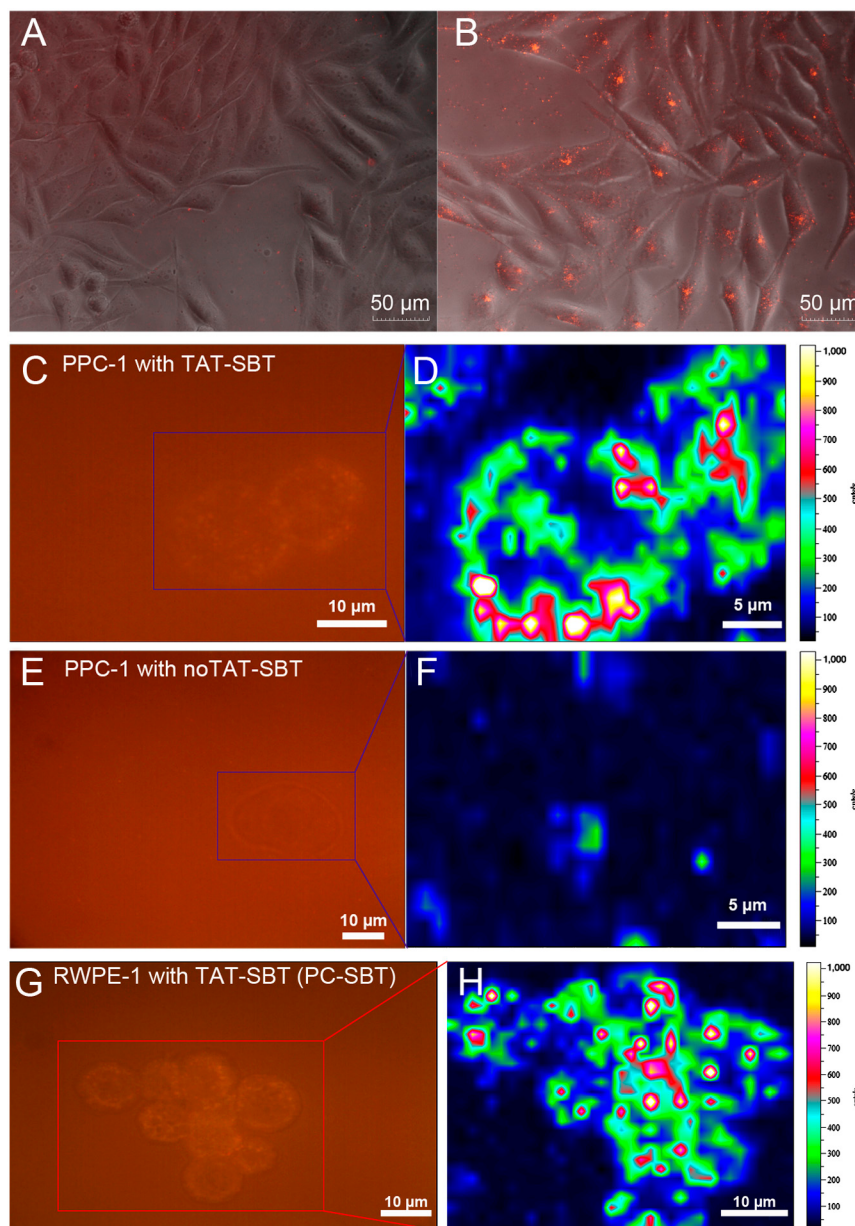

**Fig. S1.** Epifluorescence, bright field, and surface-enhanced Raman spectroscopy (SERS) maps of prostate cancer cells (PPC-1) and noncancerous prostate epithelial cells (RWPE-1) incubated with surface-enhanced resonance Raman scattering biotags (SBTs) with or without cys-TAT. (A and B) Epifluorescence images overlayed with bright field of PPC-1 cells incubated with rhodamine labeled non cys-TAT SBTs (A) and with cys-TAT SBTs (B) for 120 min in complete growth medium, at 37 °C, 5% CO<sub>2</sub>. Bright field (C and E) images and corresponding SERS maps (D and F) of PPC-1 cells incubated for 30–60 min at room temperature in DMEM supplemented with 10% FBS with either TAT (C and D) or non-TAT (E and F) SBTs. The SERS maps represent the intensity of the band at 1,620 cm<sup>-1</sup> of thionin across the mapped area. Positive control (PC) SERS biotags were also incubated with RWPE-1 cells in suspension at room temperature for 30–60 min in DMEM supplemented with 10% FBS. (G) Bright field image of the SERS mapped cells (the red rectangle represents the actual scanned area). (H) SERS map of the group of cells enclosed in the red rectangle in G. The map represents the intensity of the methylene blue band at 1,620 cm<sup>-1</sup> across the scanned area.

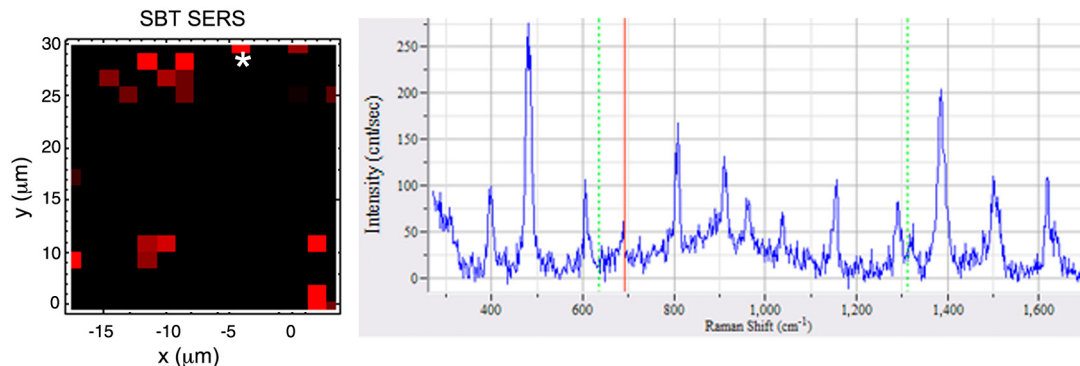

**Fig. S2.** SBTs were deposited on a glass slide and mapped using the same settings as for the cells. The signals from bright SBT were typically 100 counts or more at the most intense bands. The star indicates where in the map the spectrum comes from.

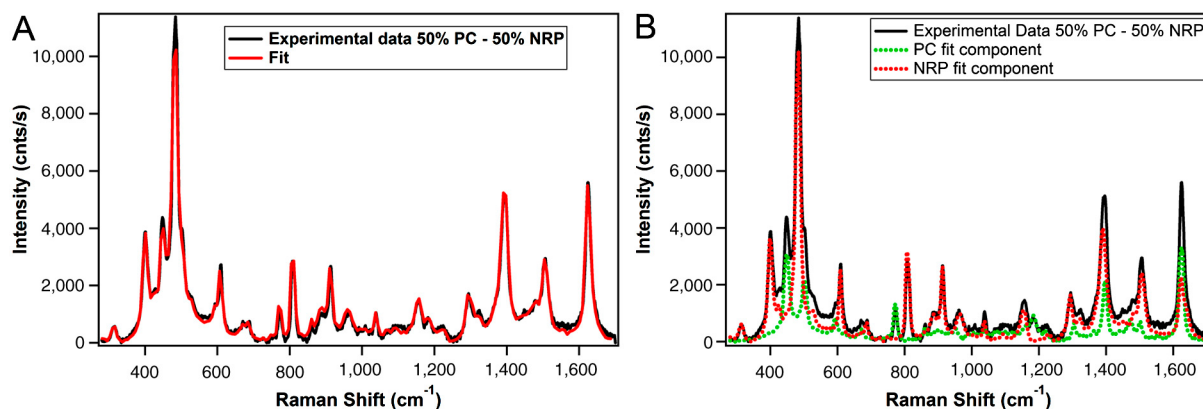

**Fig. S3.** Representative spectra and corresponding deconvolution for the calibration of the percentages of the two SBTs. Known volumes of the two SBTs were mixed in the following proportions: 90% neuropilin (NRP) (or PC)—10% PC (or NRP), 70% NRP (or PC)—30% PC (or NRP), and 50% NRP—PC. (A) Equal volumes of NRP and PC SERS biotags were mixed together, and the resulting composite spectrum is shown (black), together with the corresponding fit (red). (B) The same experimental spectrum with the deconvoluted single components calculated from the fit.

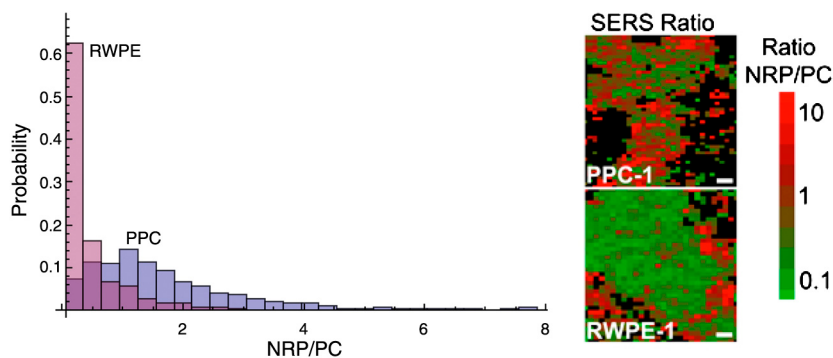

**Fig. S4.** The NRP/PC ratio from each point in the two maps (from Fig. 4 A and D), plotted as probability histograms. The tail of the RWPE is attributed to the nonspecifically associated particles around the cell periphery. The shape of these two distributions is consistent with the histogram of individual cell values in Fig. 5A that were obtained by averaging areas within maps.



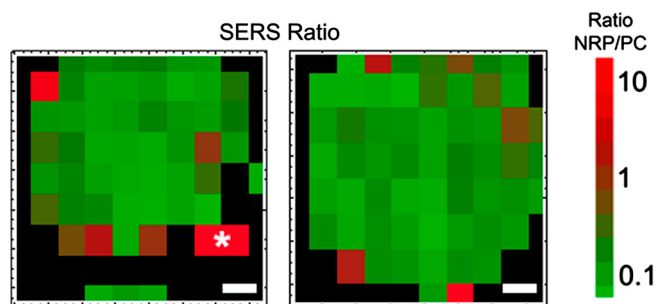

Supplement: 1109490108_pnas.1109490108_SI.pdf [file 1109490108_pnas.1109490108_SI.pdf]
